# Supplementary material for: A New Application of Spin and Fluorescence Double-Sensor Molecules
Source: MDPI journal article supplement (doi:10.3390/molecules28072978), 2023-03-27
Supplement: s1 [file s1]

Supporting Information for

# A New Application of Spin and Fluorescence Double-Sensor Molecules

Flórián Bencze <sup>1</sup>, Balázs Bognár <sup>1</sup>, Tamás Kálai <sup>1,2</sup>, László Kollár <sup>2,3</sup>, Zoltán Nagymihály <sup>2</sup>  
and Sandor Kunsági-Máté <sup>1,2,4,\*</sup>

<sup>1</sup> Department of Organic and Medicinal Chemistry, Faculty of Pharmacy, University of Pécs, Honvéd Street 1, H-7624 Pécs, Hungary

<sup>2</sup> János Szentágothai Research Center, University of Pécs, Ifjúság útja 20, H-7624 Pécs, Hungary

<sup>3</sup> ELKH-PTE Research Group for Selective Syntheses, Ifjúság útja 6, H-7624 Pécs, Hungary

<sup>4</sup> Department of Physical Chemistry and Materials Science, Faculty of Sciences, University of Pécs, Ifjúság 6, H-7624 Pécs, Hungary

\* Correspondence: kunsagi-mate.sandor@gytk.pte.hu

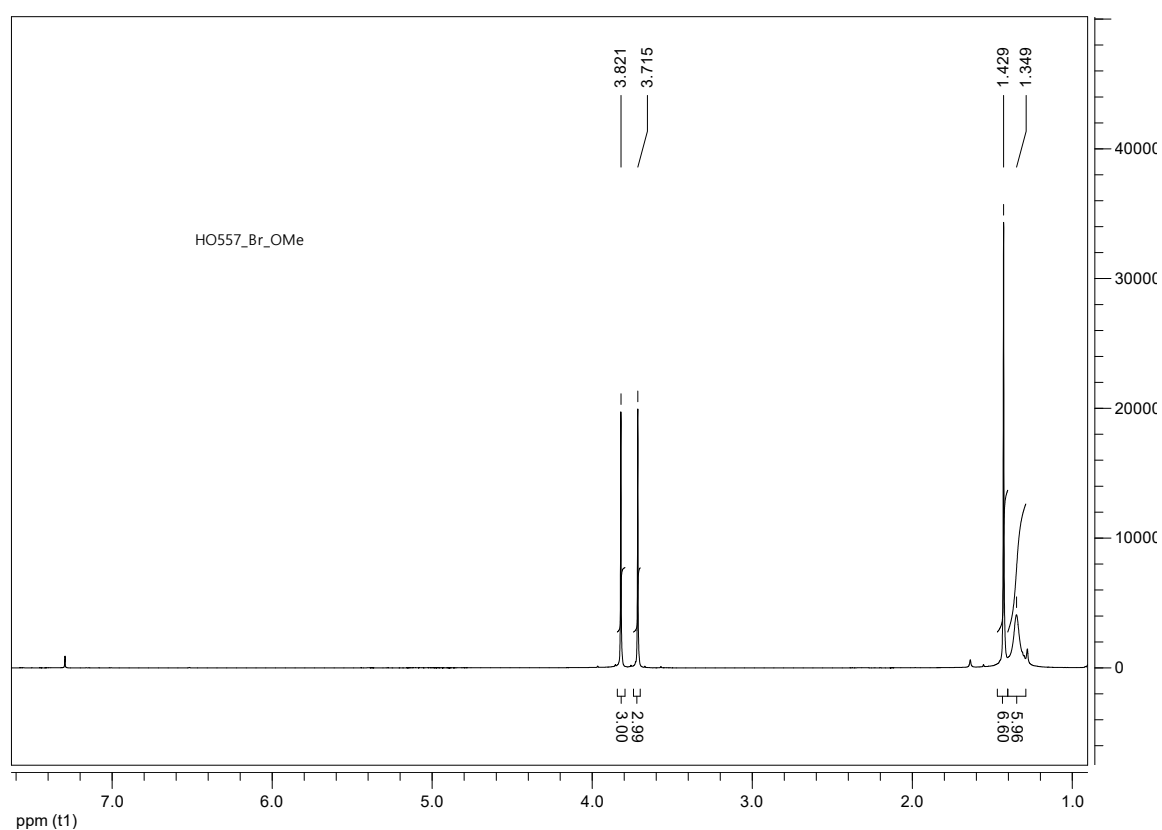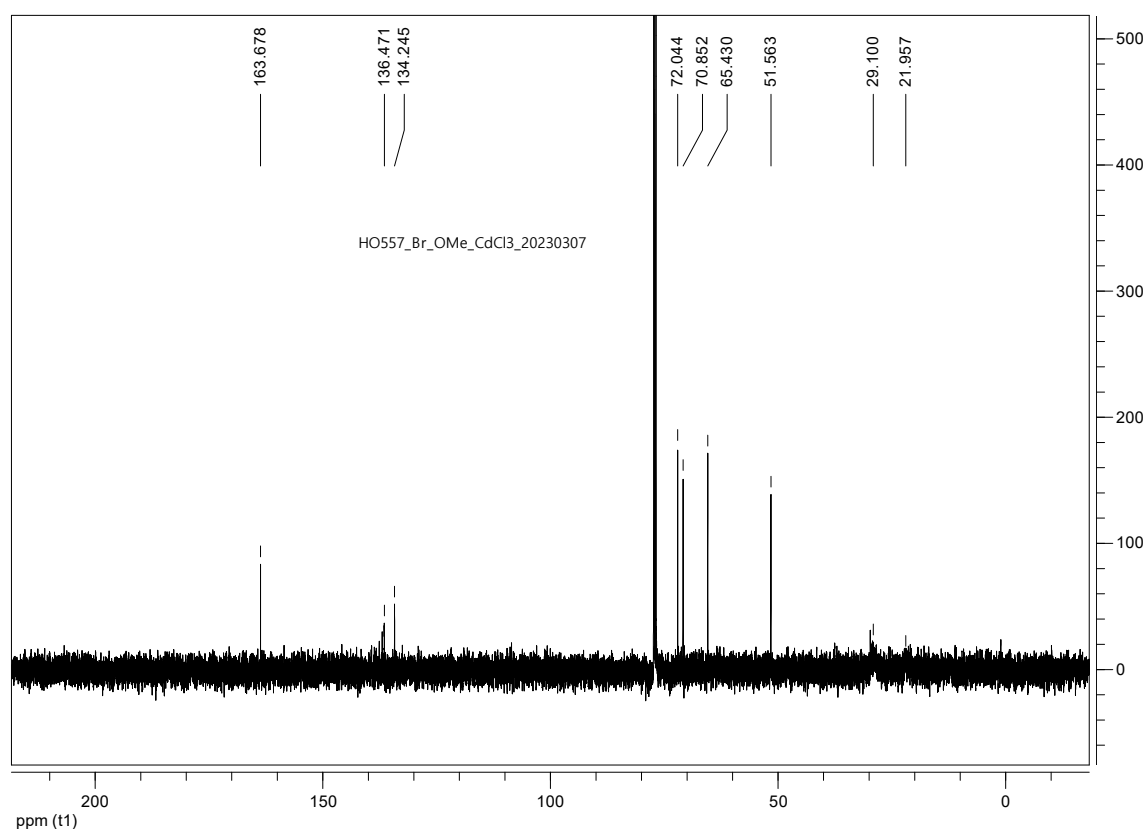

**Figure S1:** The <sup>1</sup>H NMR and <sup>13</sup>C NMR of compound 4.

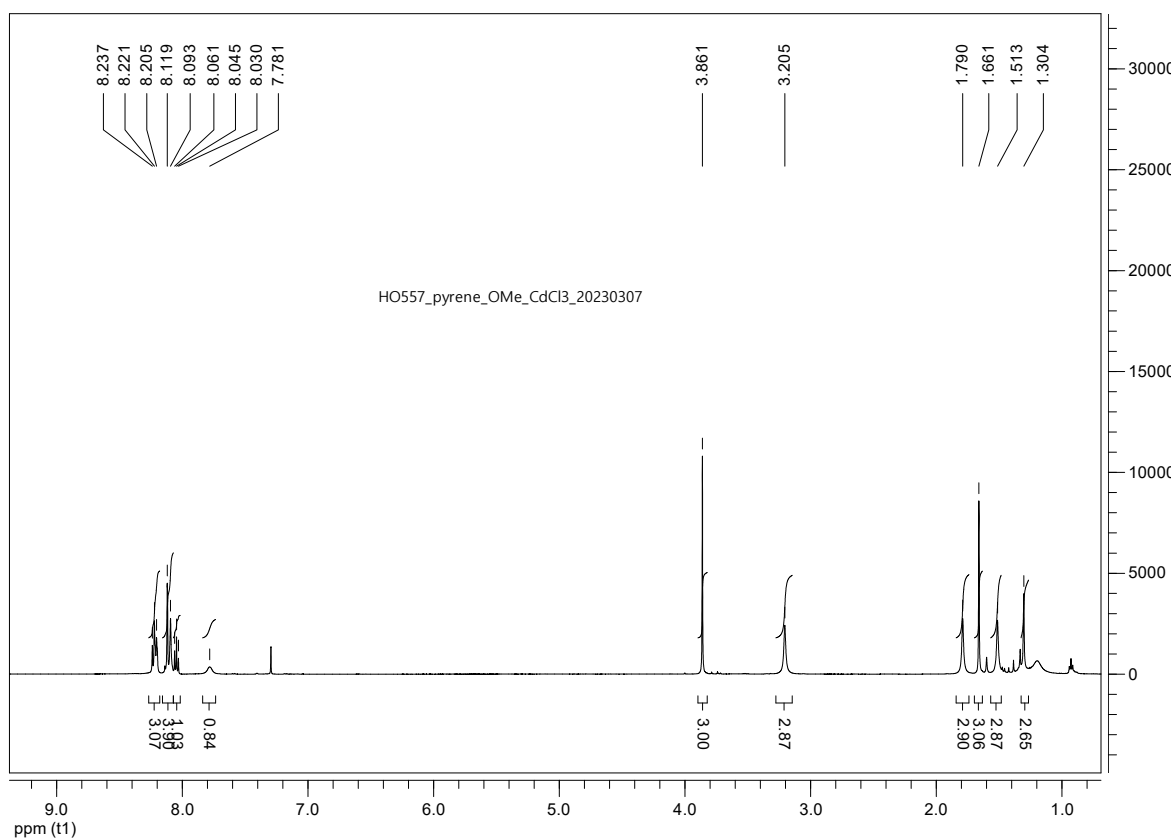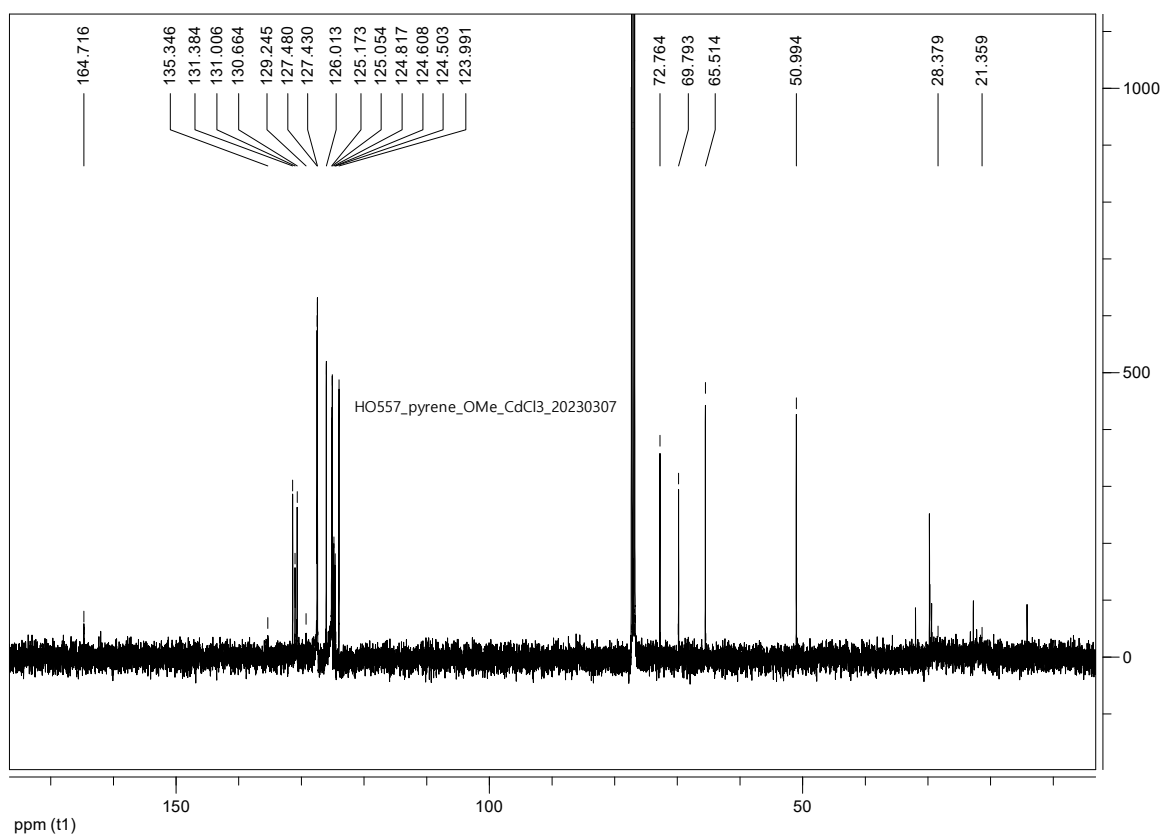

**Figure S2:** The  $^1\text{H}$  NMR and  $^{13}\text{C}$  NMR of compound 5.

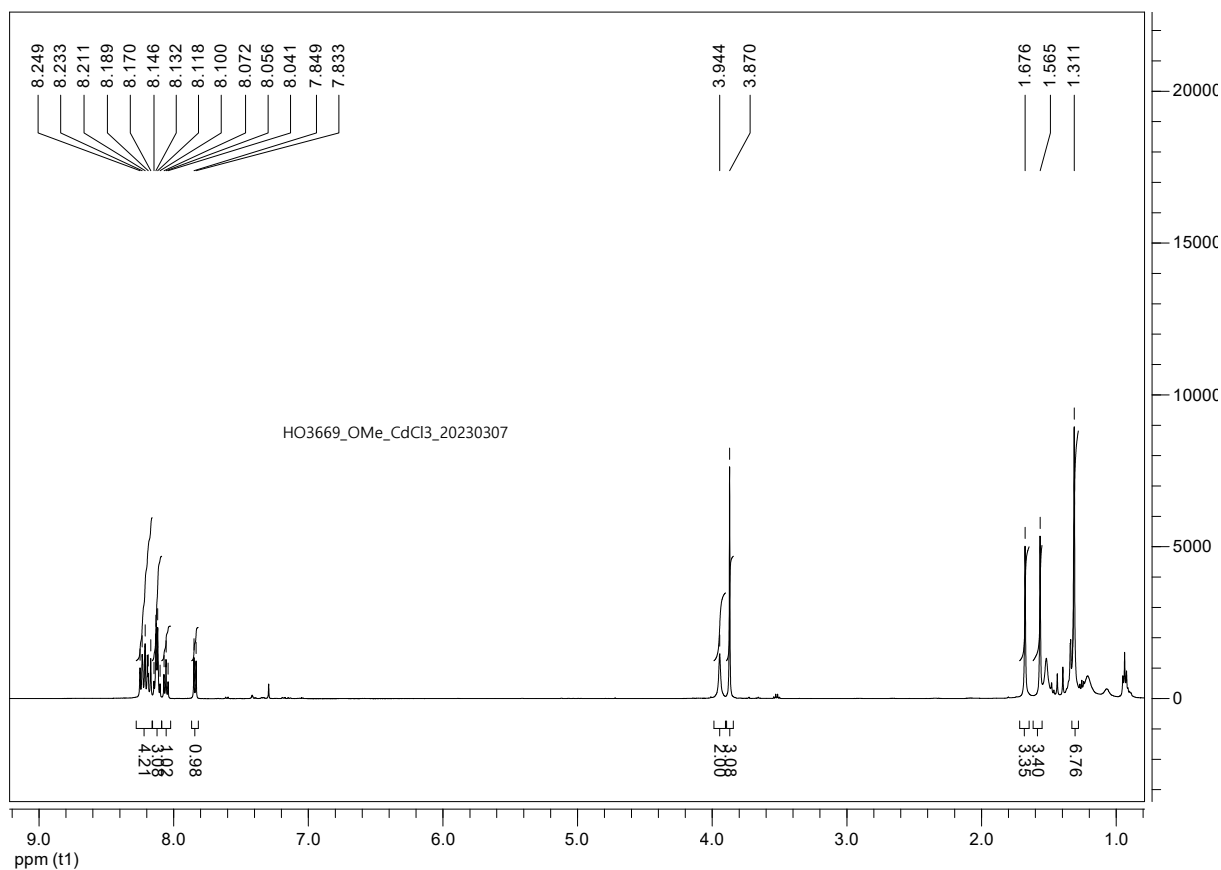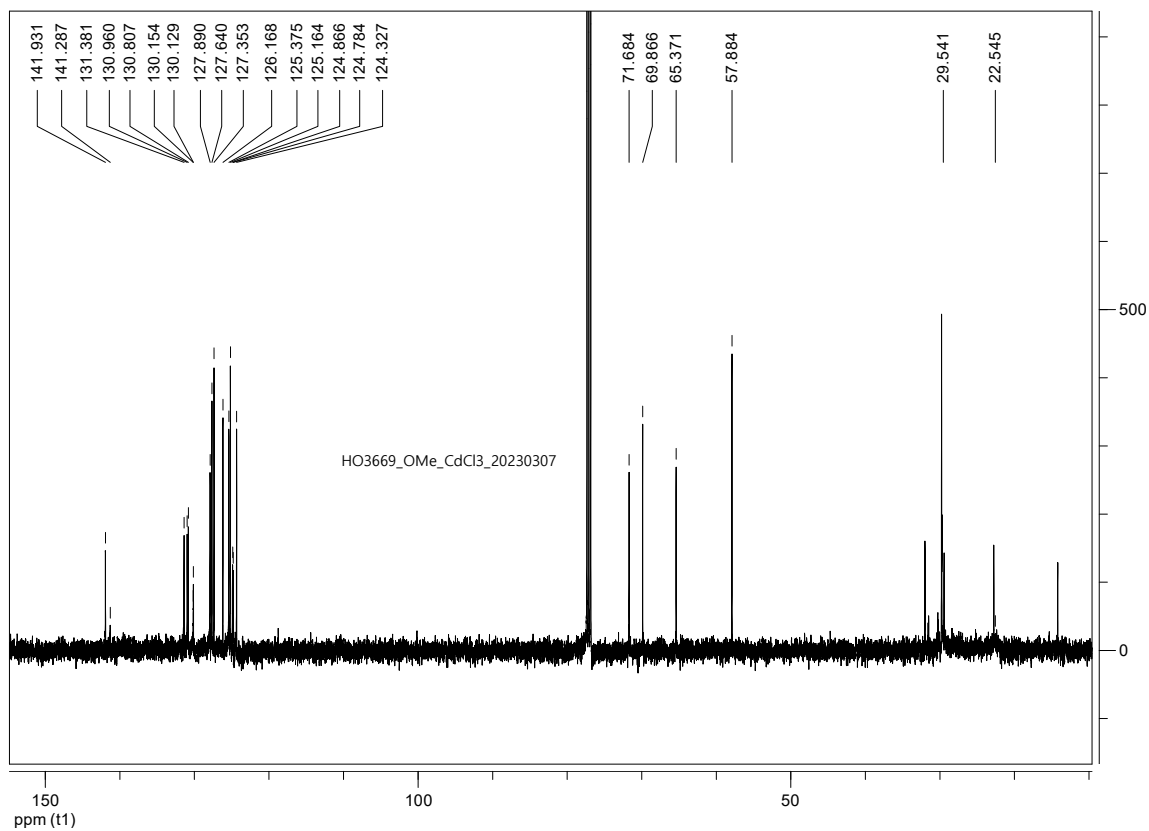

**Figure S3:** The  $^1\text{H}$  NMR and  $^{13}\text{C}$  NMR of compound 6.
